# Supplementary material for: Substratum stiffness regulates Erk signaling dynamics through receptor-level control
Source: PubMed Central journal article supplement (PMC8756379; doi:10.1016/j.celrep.2021.110181), 2021-12-28
Supplement: NIHMS1767658-supplement-1.pdf [file NIHMS1767658-supplement-1.pdf]

**Cell Reports, Volume 37**

**Supplemental information**

**Substratum stiffness regulates Erk signaling  
dynamics through receptor-level control**

**Payam E. Farahani, Sandra B. Lemke, Elliot Dine, Giselle Uribe, Jared E. Toettcher, and Celeste M. Nelson**

1 **Supplementary Figures**

2

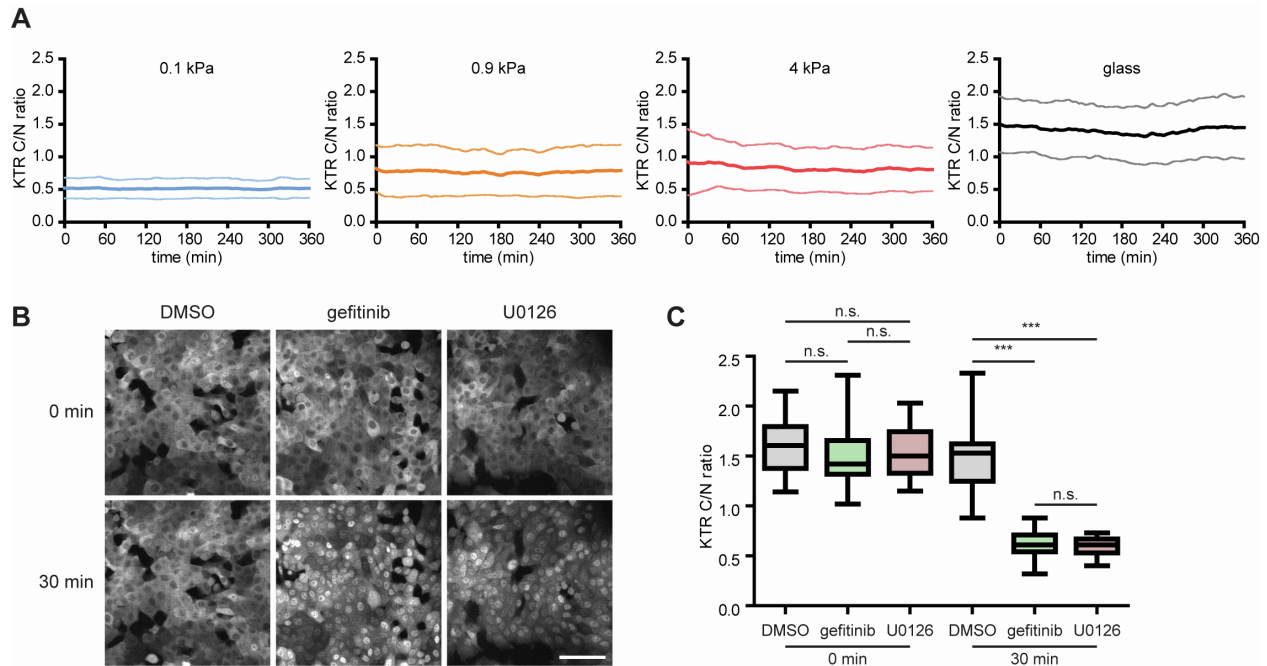

3

4

5 **Figure S1. Steady-state signaling in growth medium requires signaling through EGFR.** (A)  
 6 Mean  $\pm$  S.D. population-averaged KTR C/N ratios measured in Figure 1 confirm that Erk  
 7 signaling is at steady-state levels over the duration of time-lapse imaging. (B) Representative  
 8 images of MCF10A cells in growth medium treated with DMSO, gefitinib (5  $\mu$ M), or U0126 (10  
 9  $\mu$ M) (scale bar, 100  $\mu$ m). (C) C/N ratios before and 30 min after drug treatment. Boxes and  
 10 whiskers represent the 25-75<sup>th</sup> percentiles and minima and maxima, respectively. Mean values  
 11 are indicated by horizontal lines. \*\*\*,  $p < 0.001$ ; n.s., not significant using one-way ANOVA and  
 12 Tukey *post hoc* tests. For each condition,  $n = 30$  cells from 3 biological replicates. Related to  
 13 Figure 1.

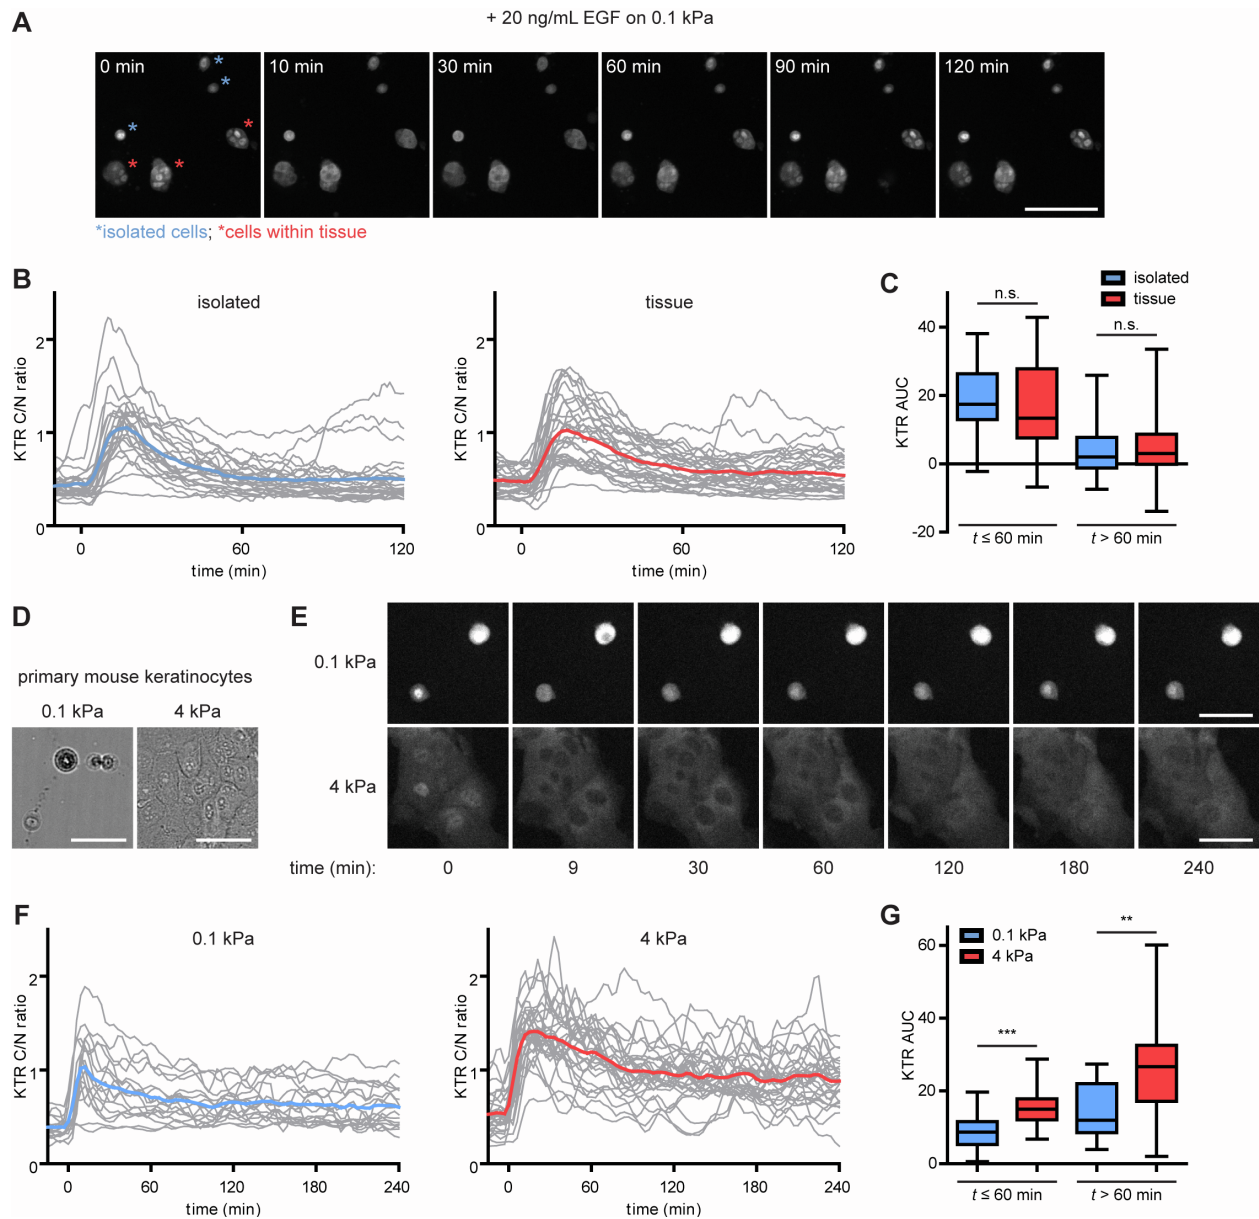

14  
15  
16  
17  
18  
19  
20  
21  
22  
23  
24  
25  
26  
27  
28

**Figure S2. Extended analysis of growth factor-stimulated Erk signaling.** (A) Representative time-lapse images of MCF10A cells cultured on soft substrata and treated with EGF (20 ng/mL). Isolated cells and cells within tissues are denoted by blue and red asterisks, respectively (scale bar, 100  $\mu$ m). (B) Mean Erk trajectories of MCF10A cells after EGF treatment, with the responses of individual cells represented by gray lines. (C) Cumulative Erk responses at early and late time points as measured by the KTR AUC. Boxes and whiskers represent the 25-75<sup>th</sup> percentiles and minima and maxima, respectively. Mean values are indicated by horizontal lines. Figures S2B,C: for each condition,  $n > 20$  cells from 3 biological replicates. (D) Representative images of keratinocytes cultured on soft or stiff substrata (scale bars, 50  $\mu$ m). (E) Representative time-lapse images of keratinocytes on soft or stiff substrata treated with EGF (20 ng/mL) (scale bars, 50  $\mu$ m). (F) Mean Erk trajectories of keratinocytes after EGF treatment, with the responses of individual cells represented by gray lines. (G) Cumulative Erk responses at early and late time points as measured by the KTR AUC. Boxes and whiskers represent the 25-75<sup>th</sup> percentiles and

29 minima and maxima, respectively. Mean values are indicated by horizontal lines. Figures S2F,G:  
30 for each condition,  $n > 15$  cells from 3 biological replicates. \*\*\*,  $p < 0.001$ ; \*\*,  $p < 0.01$ ; n.s.,  
31 not significant using an unpaired  $t$ -test. Related to Figure 2.

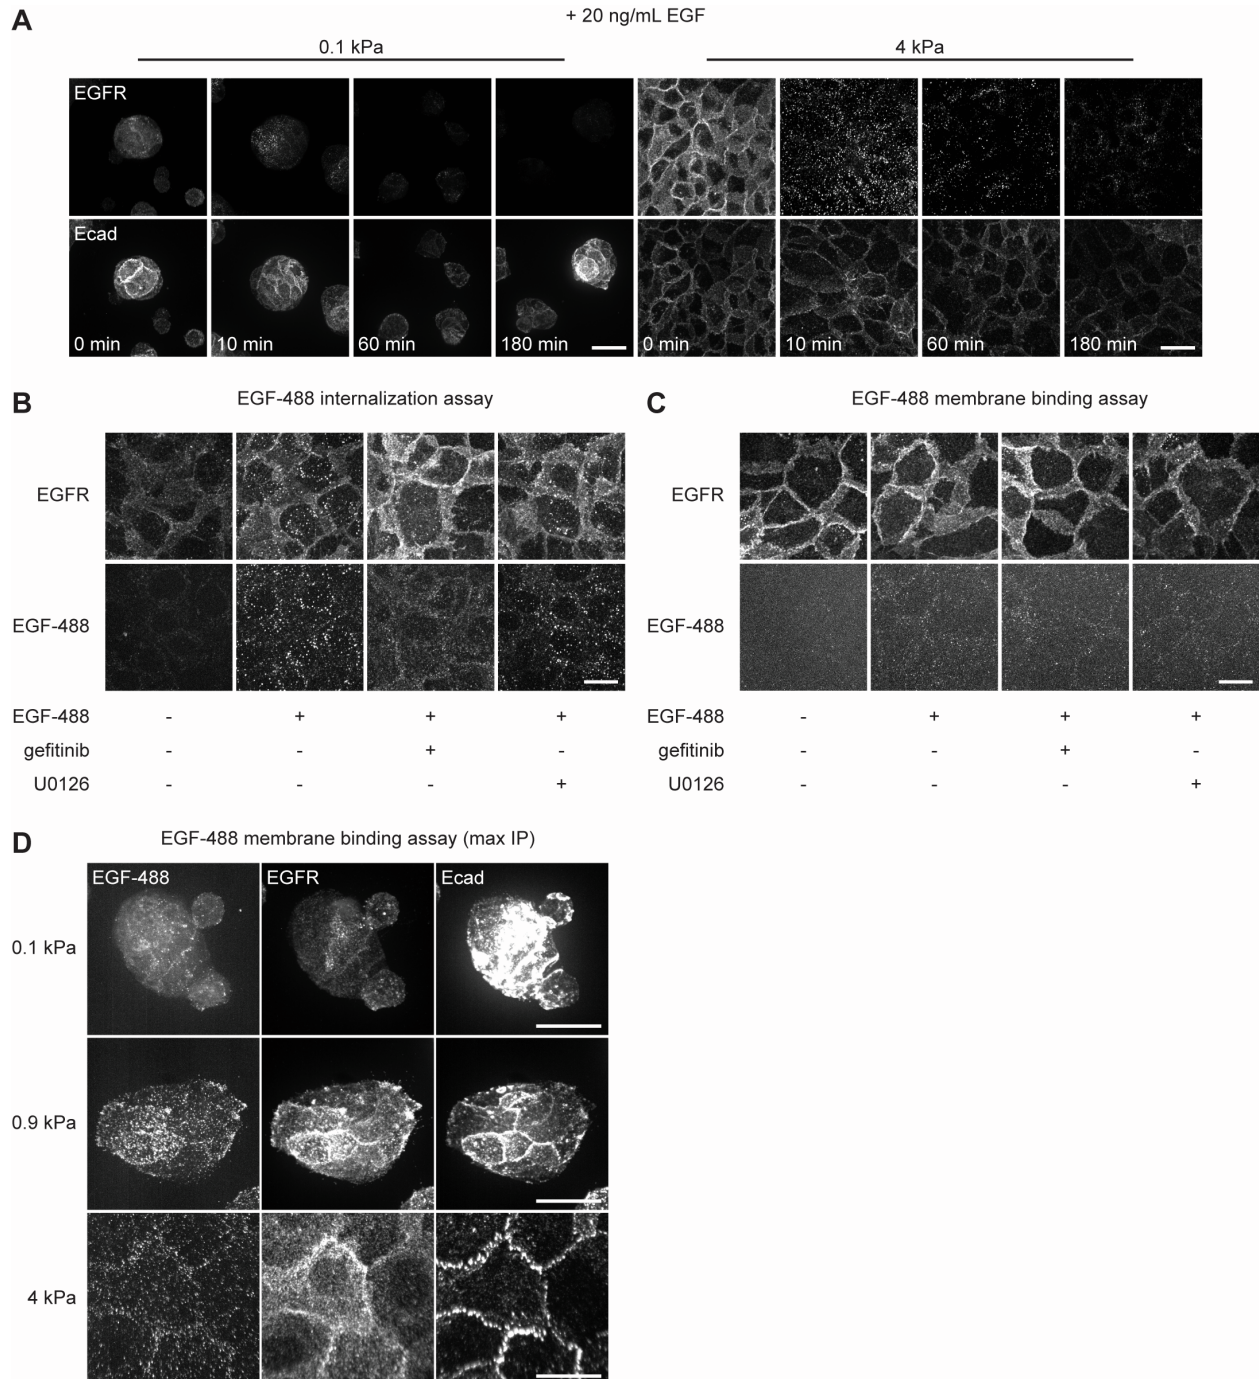

32  
33

34 **Figure S3. Extended analyses of EGFR internalization, ligand internalization, and ligand**  
 35 **membrane binding.** (A) Max IP images of MCF10A cells cultured on soft or stiff substrata in  
 36 GF-free medium, stimulated with EGF (20 ng/mL), and subjected to immunostaining analysis for  
 37 EGFR and E-cadherin (Ecad) (scale bars, 30  $\mu$ m). Representative max IP images of cells  
 38 subjected to (B) EGF-488 internalization and (C) EGF-488 membrane binding assays after pre-  
 39 treatment with gefitinib (5  $\mu$ M) or U0126 (10  $\mu$ M) (scale bars, 20  $\mu$ m). (D) Max IP images of  
 40 cells on different substrata subjected to EGF-488 membrane binding assays and immunostaining  
 41 for EGFR and Ecad, from Figure 5F (scale bars, 20  $\mu$ m). Related to Figure 5.

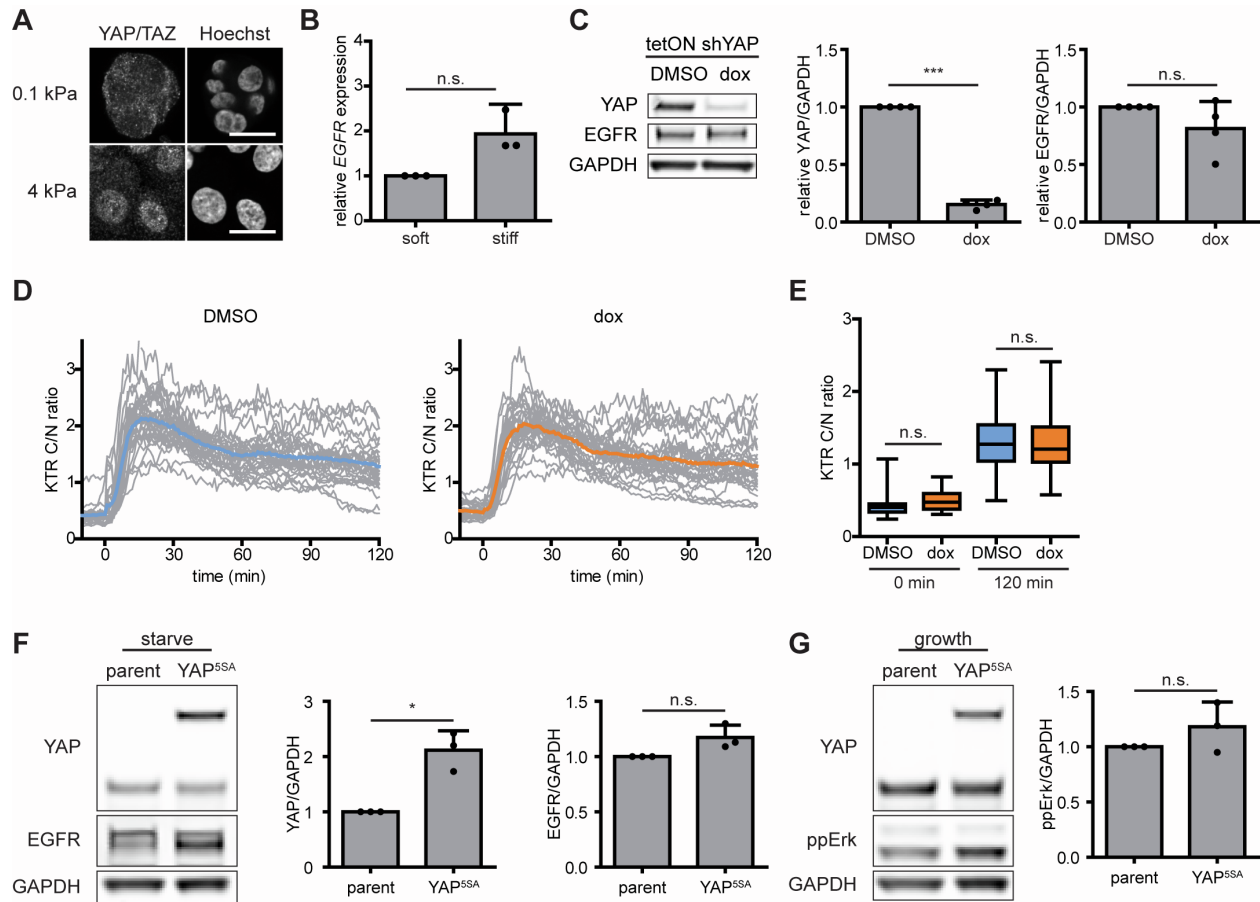

42  
43

44 **Figure S4. Substratum stiffness modulates EGFR/Erk signal transmission independently of**  
 45 **YAP.** (A) Representative images of MCF10A cells cultured in growth medium on soft or stiff  
 46 substrata and subjected to immunofluorescence analysis for YAP/TAZ (scale bars, 20  $\mu$ m). (B)  
 47 Mean + S.D. transcript levels of *EGFR* in cells cultured in GF-free medium on soft or stiff  
 48 substrata.  $n = 3$  biological replicates. (C) Depleting YAP expression by inducing YAP-targeting  
 49 shRNA (shYAP) with doxycycline (dox) decreases the levels of YAP but not EGFR in cells  
 50 cultured on plastic.  $n = 4$  biological replicates. (D) Mean Erk trajectories of shYAP-expressing  
 51 cells and control cells after EGF treatment (20 ng/mL), with the responses of individual cells  
 52 represented by gray lines. (E) C/N ratios before and 120 min after EGF treatment. Boxes and  
 53 whiskers in (E) represent the 25-75<sup>th</sup> percentiles and minima and maxima, respectively. For each  
 54 condition,  $n = 30$  cells from 3 biological replicates. n.s., not significant using an unpaired *t*-test.  
 55 (F) Cells cultured in GF-free medium on soft substrata expressing a constitutively active YAP  
 56 (YFP-YAP<sup>55A</sup>) have higher levels of YAP expression and comparable levels of EGFR.  $n = 3$   
 57 biological replicates. (G) YFP-YAP<sup>55A</sup>-expressing and control cells exhibit similar levels of  
 58 ppErk when cultured in growth medium on soft substrata.  $n = 3$  biological replicates. Figures  
 59 S4B-C,F-G: n.s., not significant; \*,  $p < 0.05$ ; \*\*\*,  $p < 0.001$  using a paired *t*-test. Error bars  
 60 denote S.D. Related to Figure 5.

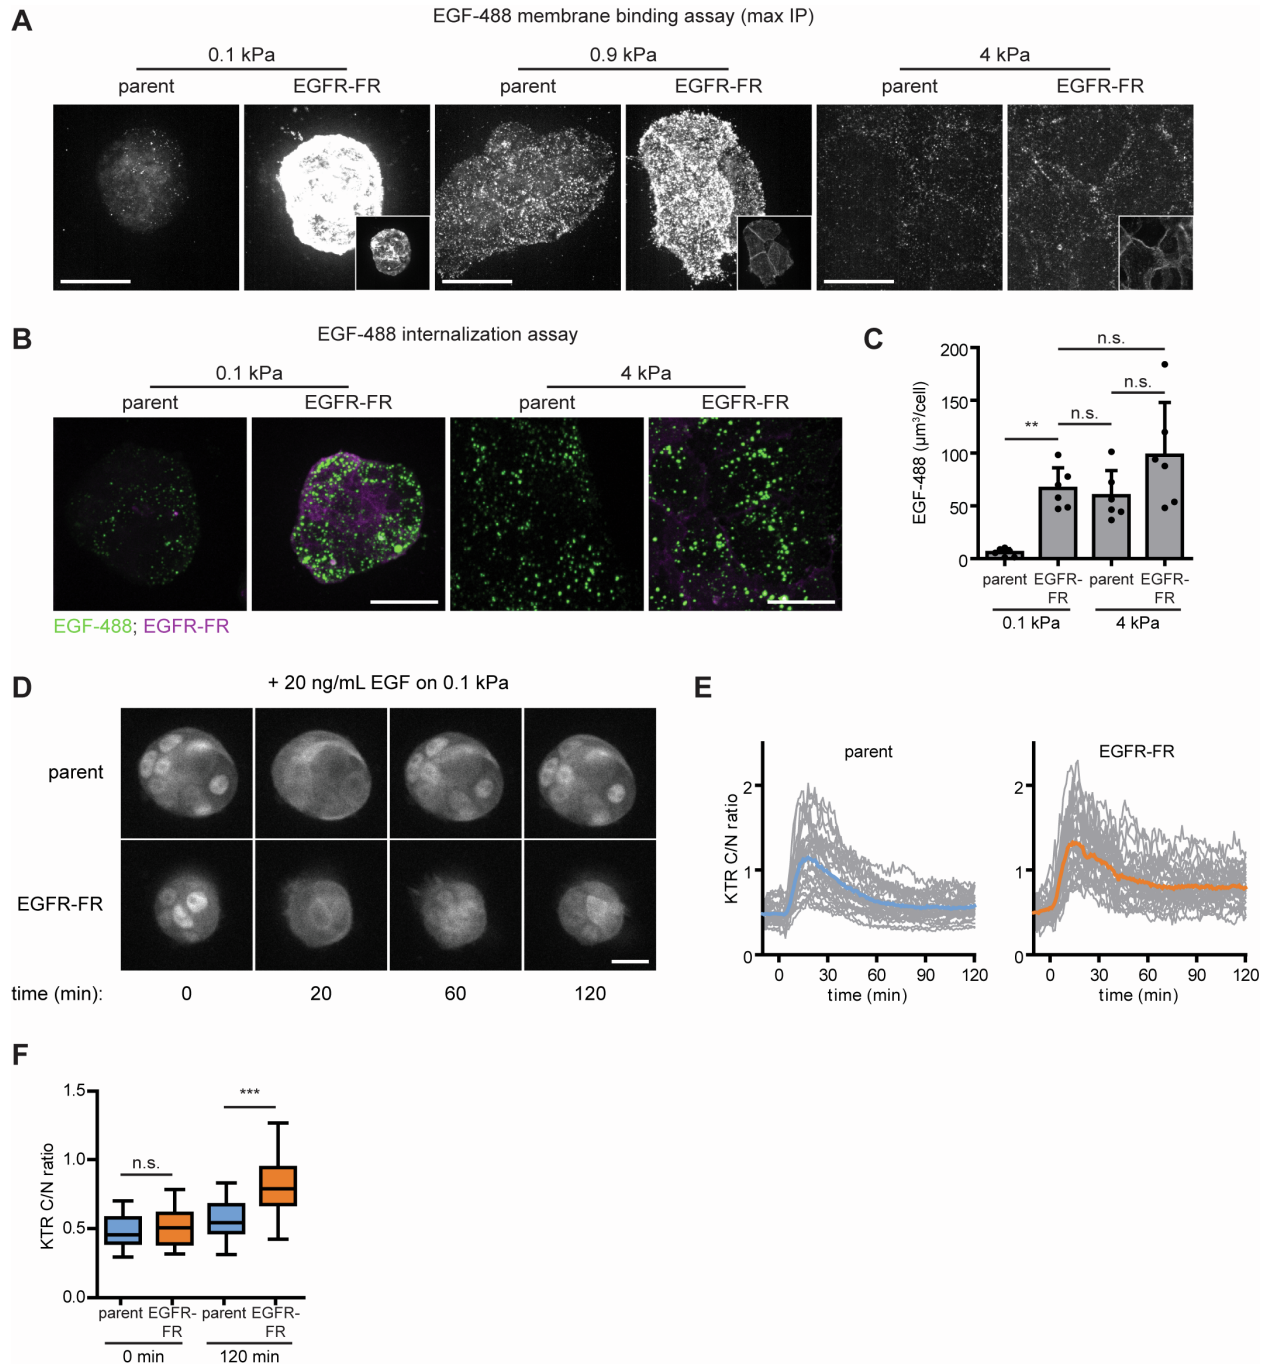

61  
62  
63  
64  
65  
66  
67  
68  
69  
70

**Figure S5. EGF internalization and downstream Erk signaling under EGFR overexpression.** (A) Max IP EGF-488 images of EGFR-FR-expressing cells or parental cells subjected to EGF-488 membrane binding assays, from Figure 6B. Inset images display EGFR-FR in EGFR-FR-expressing cells (scale bars, 20  $\mu\text{m}$ ). (B) Representative max IP images of parental or EGFR-FR-expressing cells on soft or stiff substrata treated with EGF-488 (20 ng/mL) for 20 min (scale bars, 20  $\mu\text{m}$ ). (C) Mean + S.D. quantification from (A).  $n = 6$  biological replicates. n.s., not significant; \*\*,  $p < 0.01$  using one-way ANOVA and Tukey *post hoc* tests. (D) Representative time-lapse images of parental and EGFR-FR-expressing cells on soft

71 substrata stimulated with EGF (20 ng/mL) (scale bar, 20  $\mu\text{m}$ ). (E) Mean Erk trajectories of  
72 parental and EGFR-FR-expressing cells on soft substrata after 20 ng/mL EGF treatment, with the  
73 responses of individual cells represented by gray lines. (F) C/N ratios before and 120 min after  
74 EGF treatment. Boxes and whiskers represent the 25-75<sup>th</sup> percentiles and minima and maxima,  
75 respectively. Mean values are indicated by horizontal lines. Figures S5D,E: for each condition,  $n$   
76 = 30 cells from 3 biological replicates. n.s., not significant; \*\*\*,  $p < 0.001$  using an unpaired  $t$ -  
77 test. Related to Figure 6.
